# Supplementary material for: Anti-Inflammatory Activity of a Demineralized Bone Matrix: An In Vitro Pilot Study
Source: MDPI journal article supplement (doi:10.3390/app12020876), 2022-01-15
Supplement: s1 [file s1]

Archive with 1 entries (1 files):
- applsci-1452658-supplementary.pdf
